# Supplementary material for: Effect of a Nine-Month Web- and App-Based Workplace Intervention to Promote Healthy Lifestyle and Weight Loss for Employees in the Social Welfare and Health Care Sector: A Randomized Controlled Trial
Source: PubMed Central journal article supplement (PMC5404146; doi:10.2196/jmir.6196), 2017-04-10

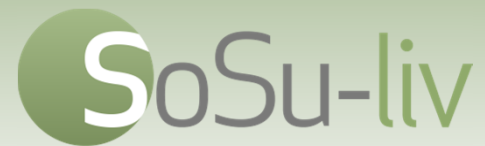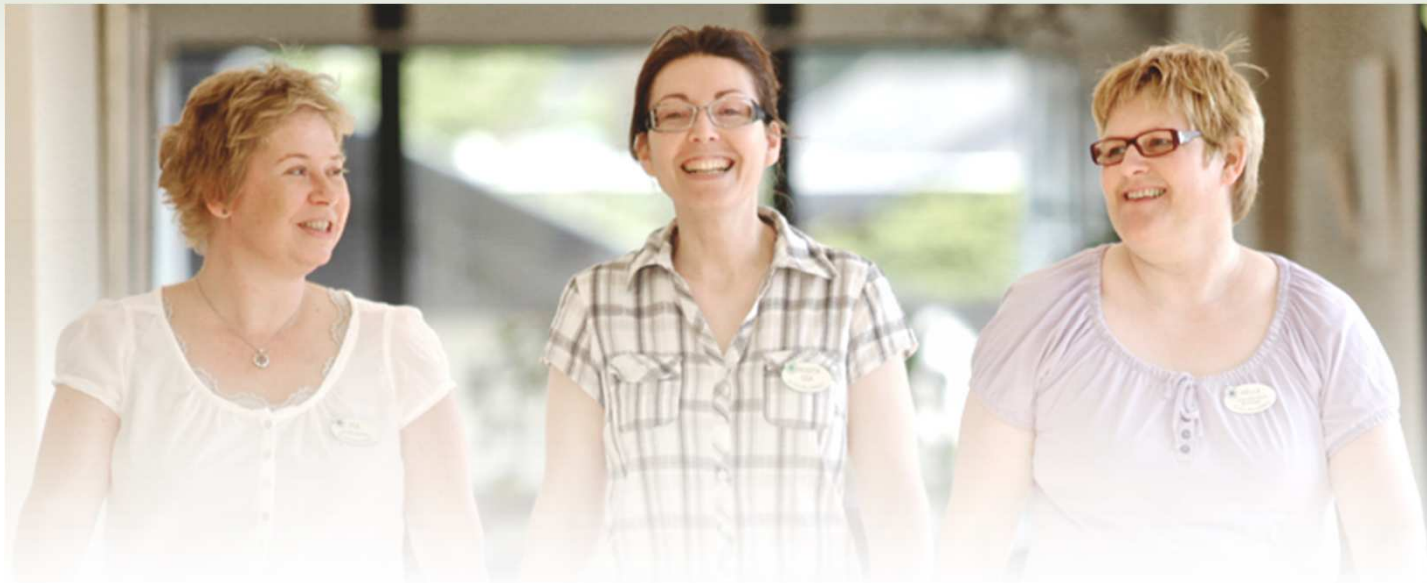

**En ny vej til  
større overskud, trivsel og velvære**

Mandag den 24. september

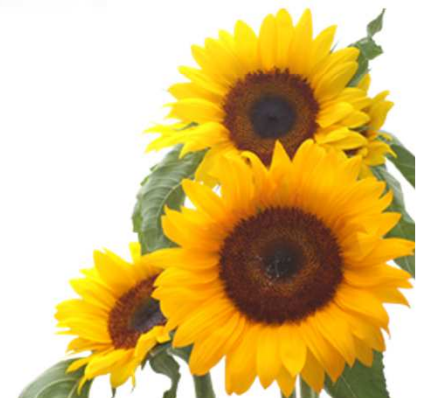

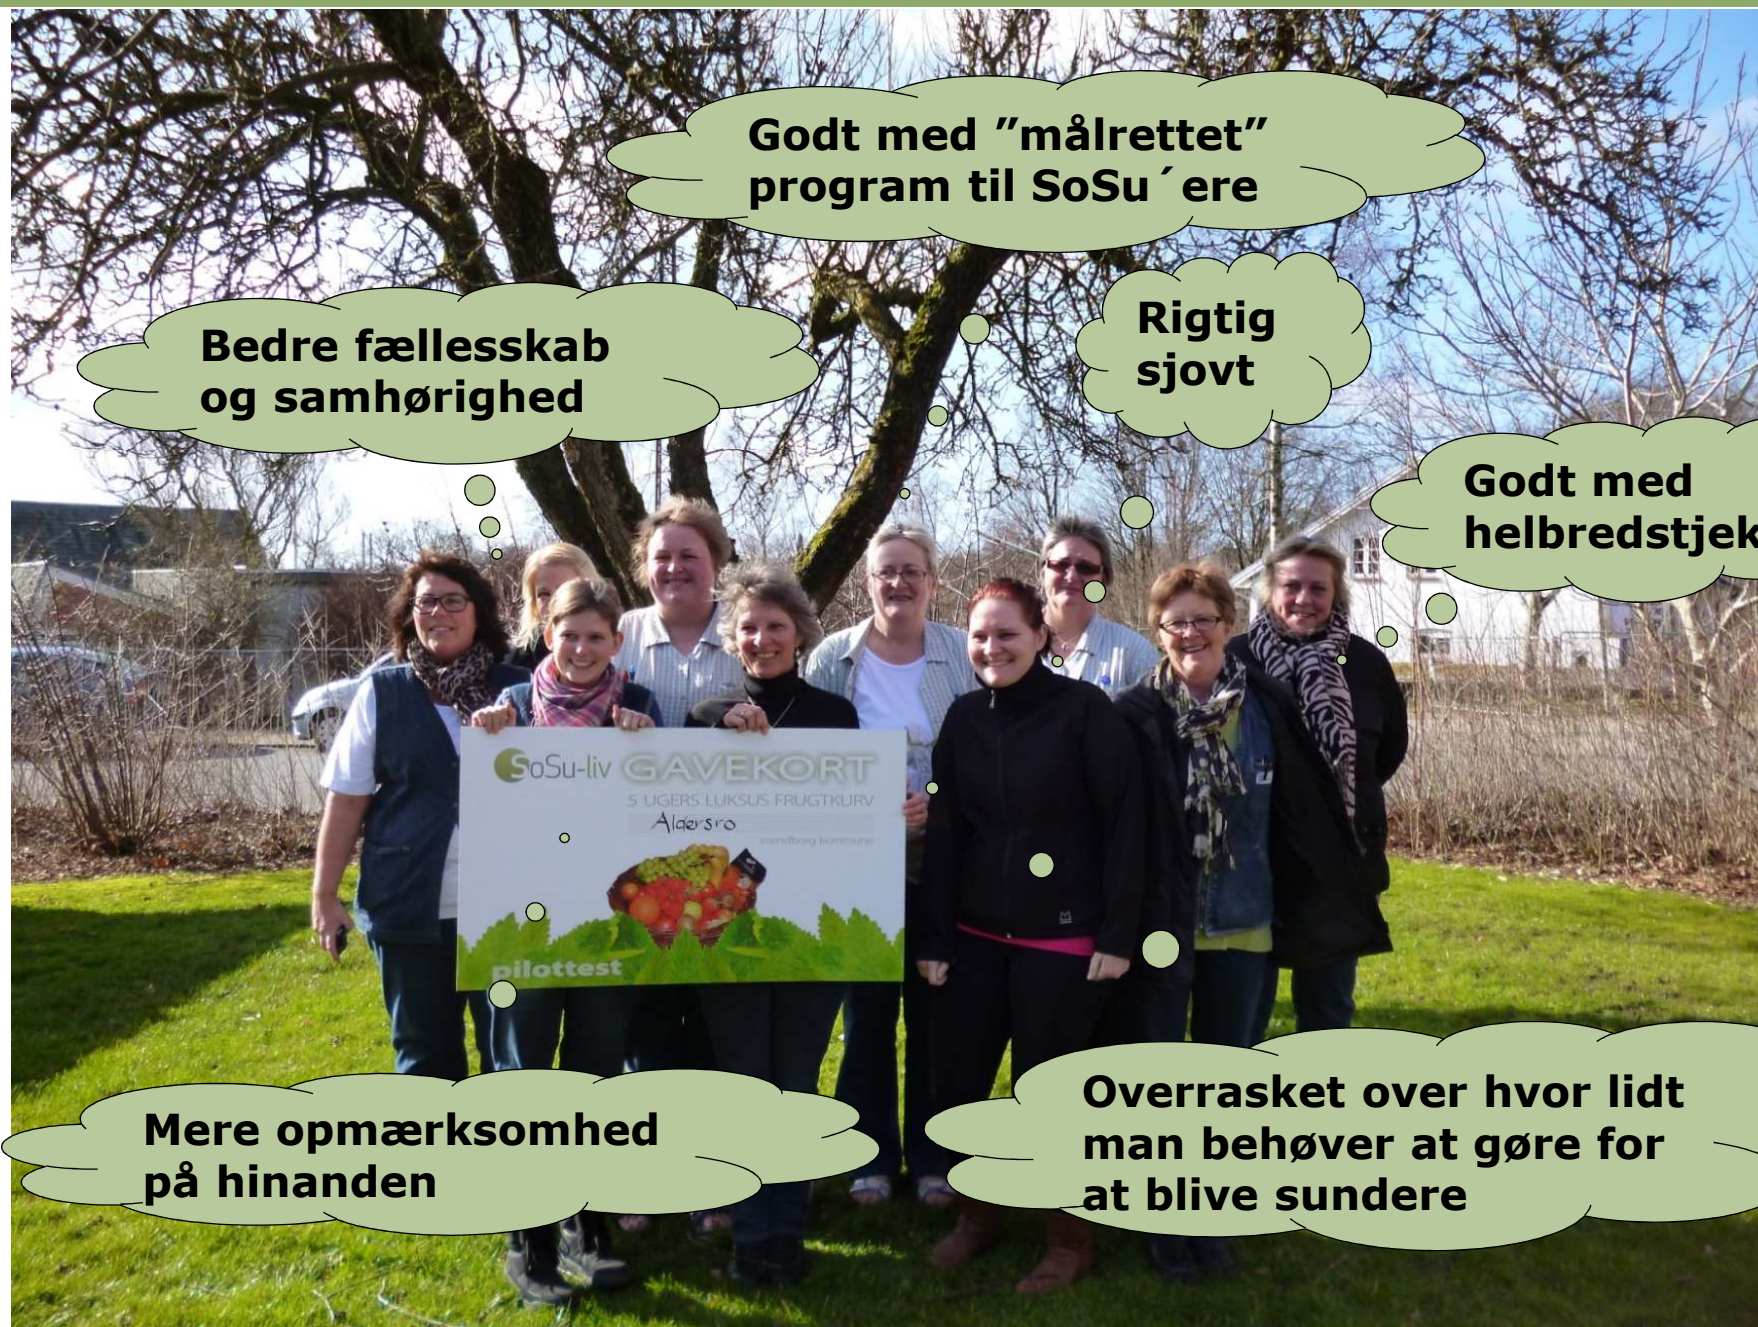

## Hvad er SoSu-liv ?

- Et gratis program til mobiltelefon og computer:
  - om kost, motion, rygning og velvære
- SoSu-liv kan hjælpe til at fremme jeres
  - trivsel og fællesskab
  - helbred og velvære

Vi ønsker, at alle offentligt ansatte på en FOA-overenskomst kan få programmet som en del af deres arbejdsmarkedspension

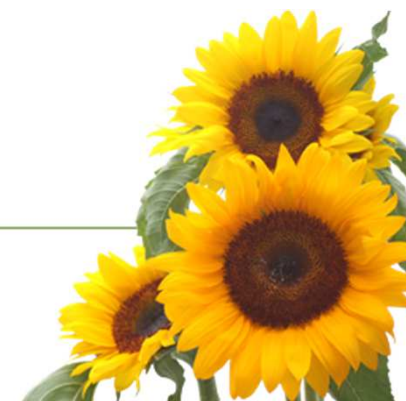

## Programmet hedder SoSu-liv

Fungerer på hjemmeside og et program på en mobiltelefon

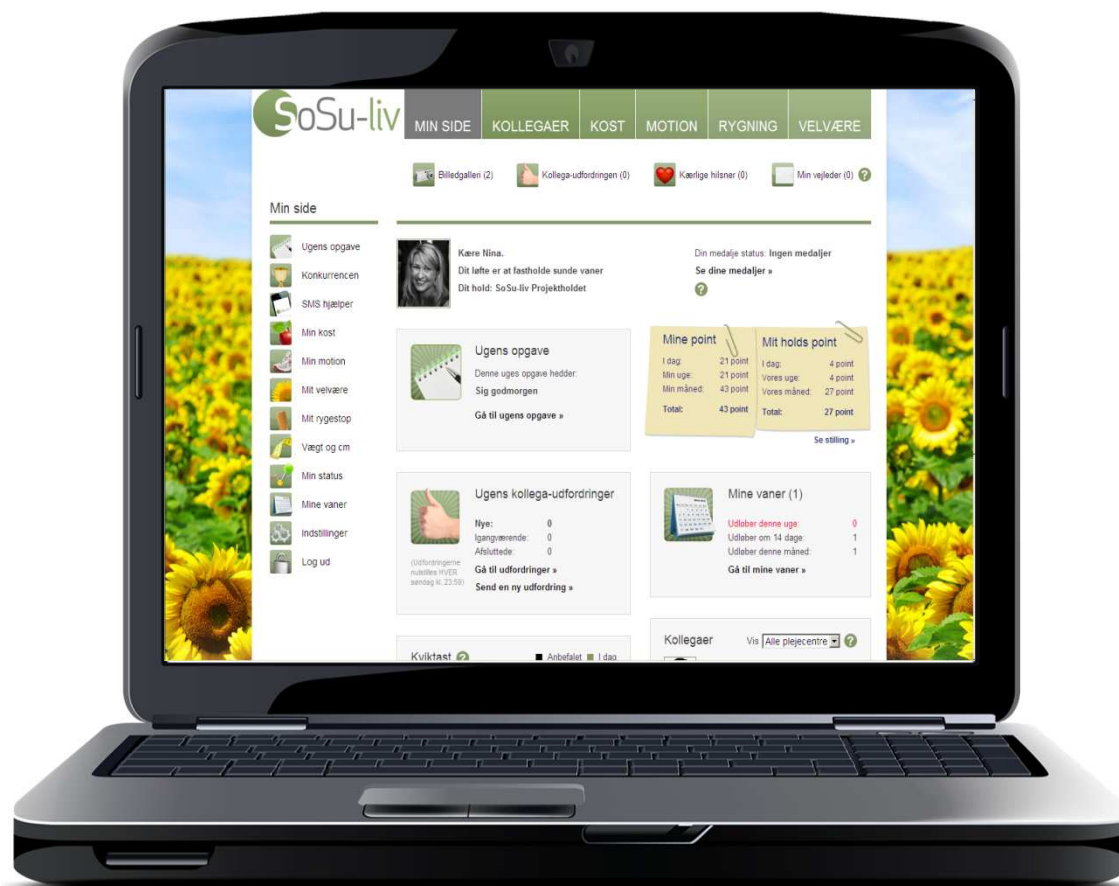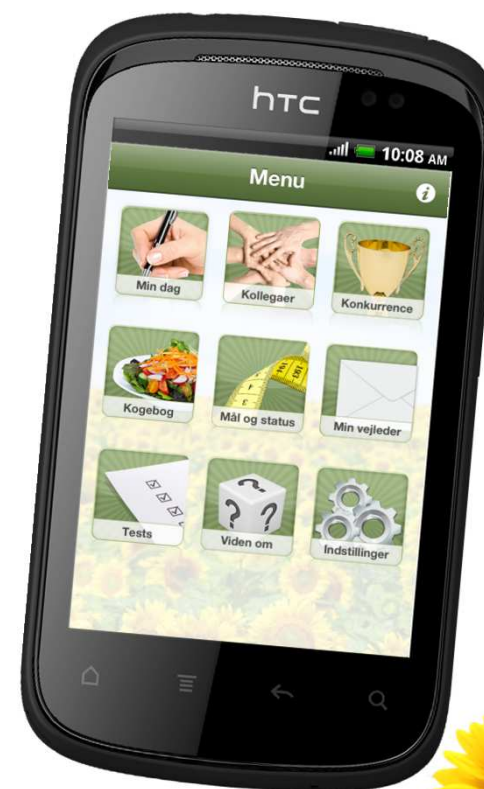

SoSu-liv

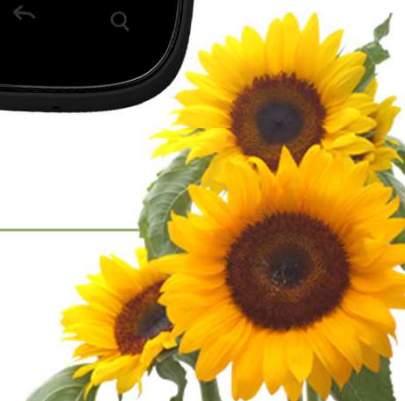

## SoSu-liv på mobiltelefon

- Du får SoSu-liv på:
  - Arbejds smartphone
  - Private smartphone
- **Eller** du låner GRATIS en mobiltelefon

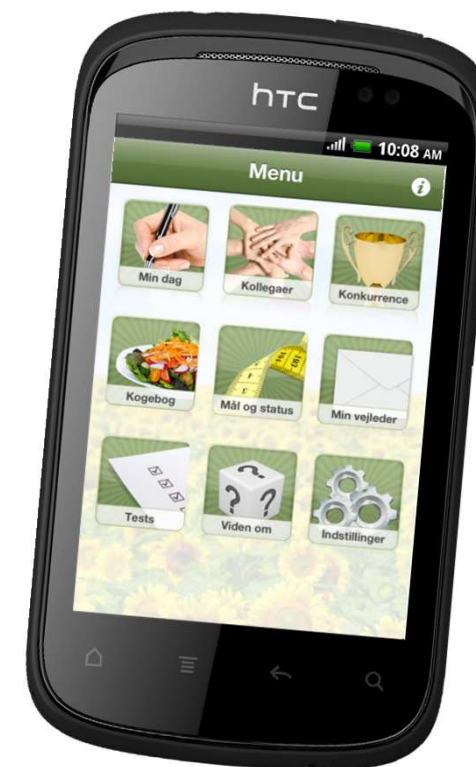

## Hvad er nyt ved SoSu-liv programmet?

- Trivsel og sundhed er noget vi **gør sammen**
- Vi kan **hjælpe hinanden** med at blive **gladere, sundere** og **få mere overskud**

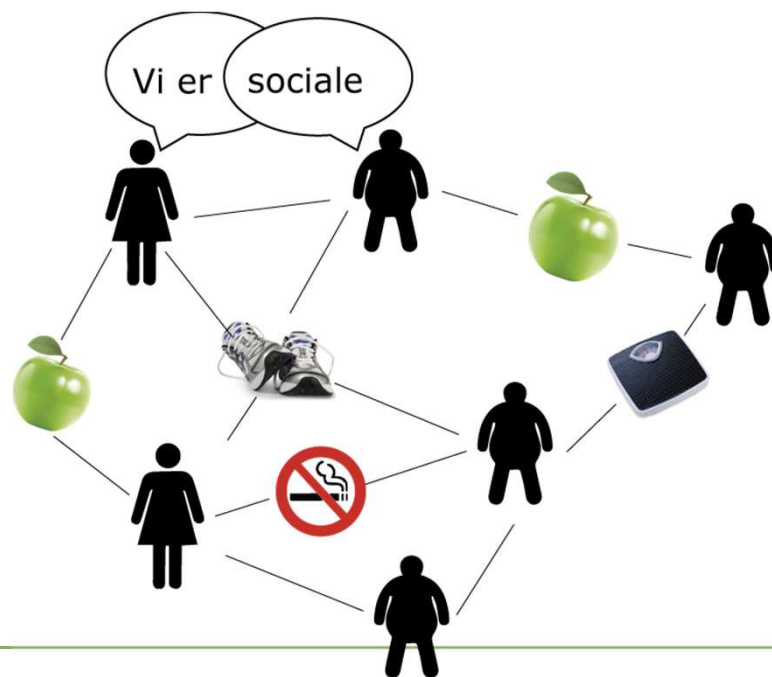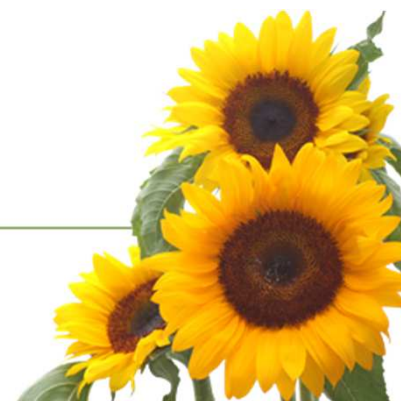

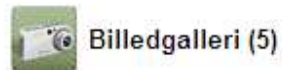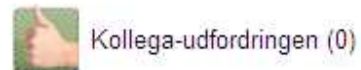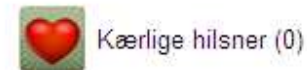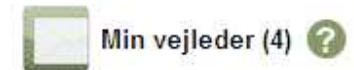

## Min side

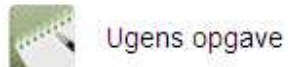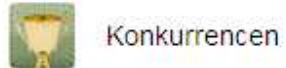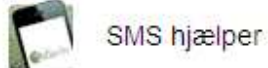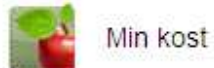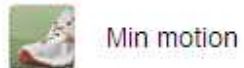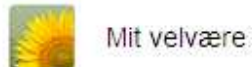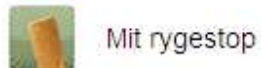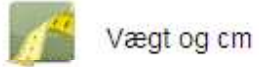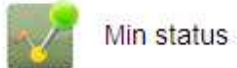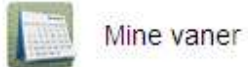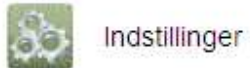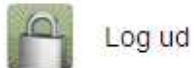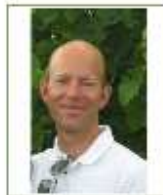

Kære Thomas.

Dit løfte er at fastholde sunde vaner

Dit hold: SoSu-liv Projektholdet

Din medalje status: **Ingen medaljer**

[Se dine medaljer »](#)

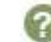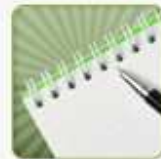

### Ugens opgave

Denne uges opgave hedder:

**Walk and talk**

[Gå til ugens opgave »](#)

### Mine point

|               |                 |
|---------------|-----------------|
| I dag:        | 1 point         |
| Min uge:      | 3 point         |
| Min måned:    | 12 point        |
| <b>Total:</b> | <b>12 point</b> |

### Mit holds point

|               |                 |
|---------------|-----------------|
| I dag:        | 0 point         |
| Vores uge:    | 6 point         |
| Vores måned:  | 31 point        |
| <b>Total:</b> | <b>93 point</b> |

[Se stilling »](#)

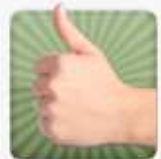

### Ugens kollega-udfordringer

|               |   |
|---------------|---|
| Nye:          | 0 |
| Igangværende: | 0 |
| Afsluttede:   | 0 |

[Gå til udfordringer »](#)

[Send en ny udfordring »](#)

(Udfordringerne nulstilles HVER søndag kl. 23:59)

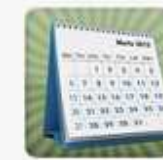

### Mine vaner (0)

|                      |   |
|----------------------|---|
| Udløber denne uge:   | 0 |
| Udløber om 14 dage:  | 0 |
| Udløber denne måned: | 0 |

[Gå til mine vaner »](#)

## Ugeopgaver

- I 16 uger er der ugeopgaver
- Ugeopgaver er øvelser inden for kost, motion eller velvære
- Øvelserne kan løses på ca. 5 minutter
- Alle på holdet laver den samme opgave

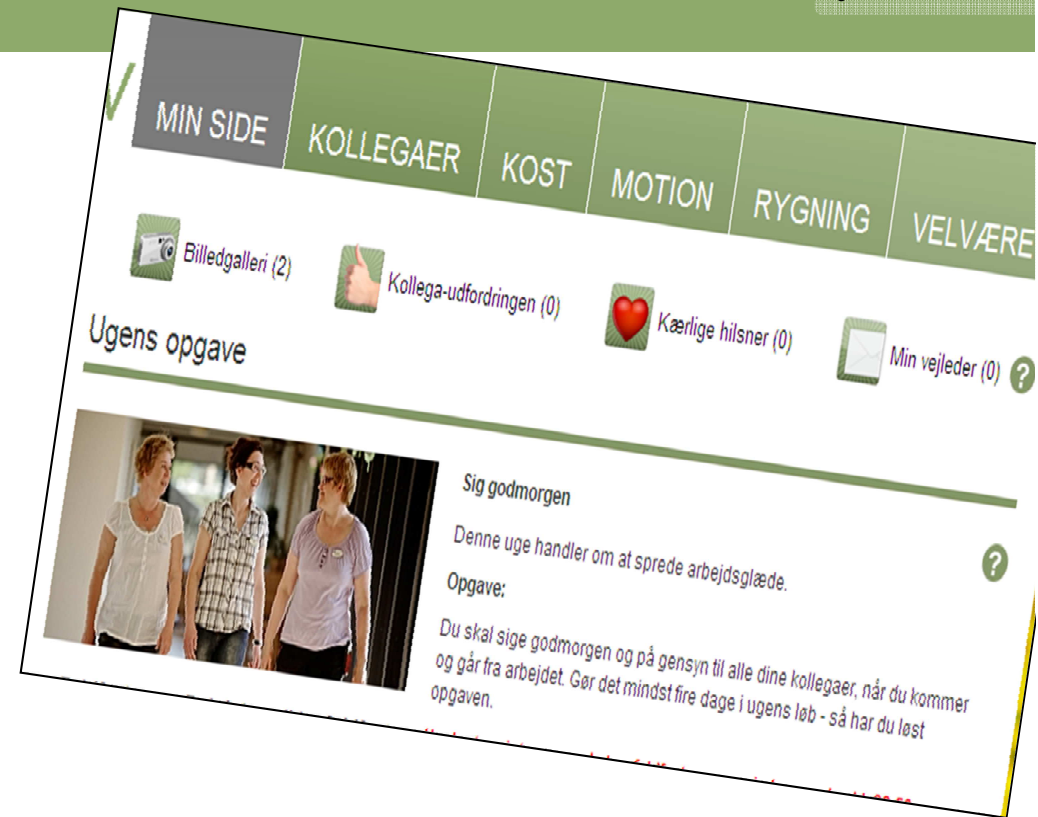

Opgaven åbnes mandag morgen kl. 00.01  
Opgaven lukkes søndag aften kl. 23.59

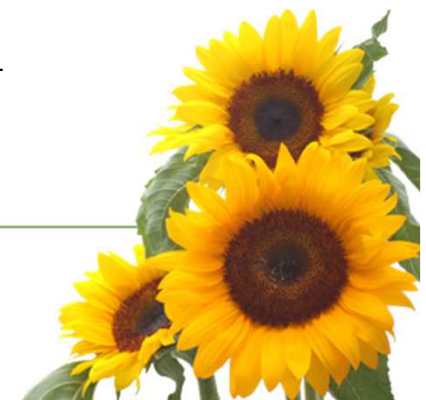



## Ugens opgave: Sådan gør du ....

### Ugens opgave



**Sig godmorgen** ?

Denne uge handler om at sprede arbejdsglæde.

**Opgave:**

Du skal sige godmorgen og på gensyn til alle dine kollegaer, når du kommer og går fra arbejdet. Gør det mindst fire dage i ugens løb - så har du løst opgaven.

**Fuldført**  **Delvist**  **Ikke fuldført**

**Husk at registrere om du har fuldført opgaven inden søndag kl. 23:59**

Når du løser ugens opgave, får du point i **konkurrencen**.

**HUSK**  
at registrere,  
at du har løst  
opgaven

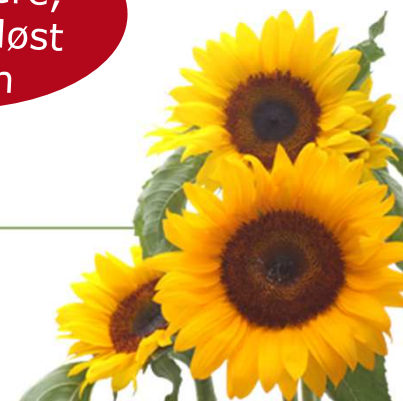

## Kollegaudfordring

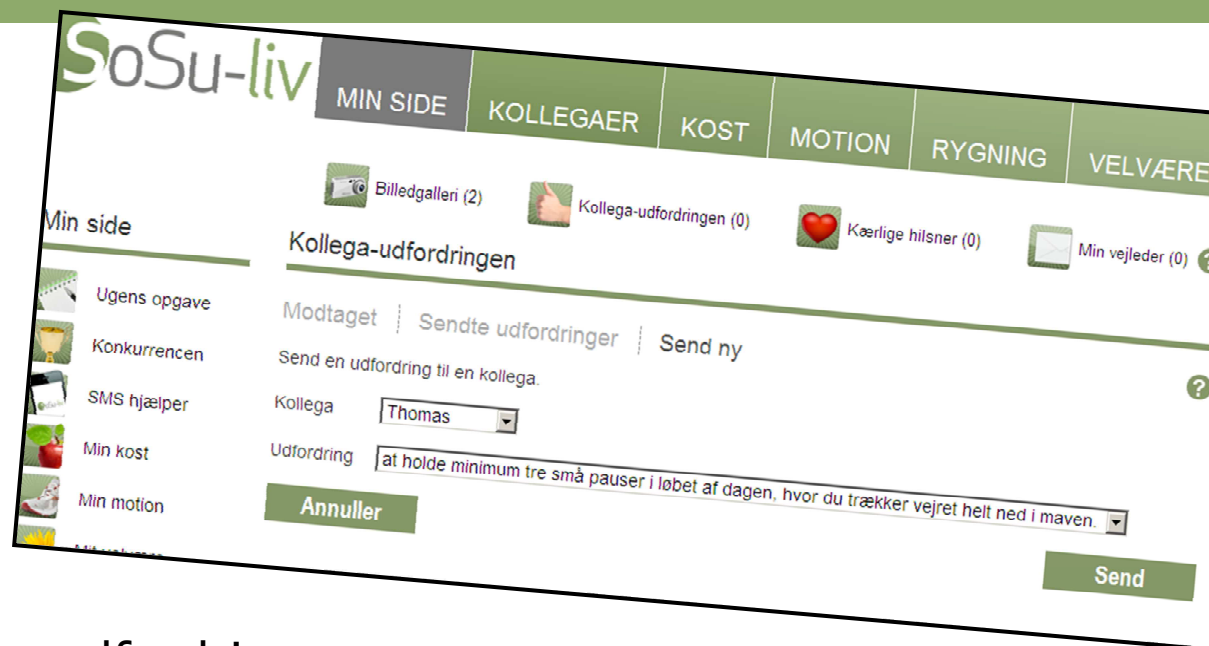

- I 16 uger er der kollegaudfordringer
- Du kan vælge imellem inden for: kost, motion, rygning eller velvære



## Kollegaudfordring: Sådan gør du ....

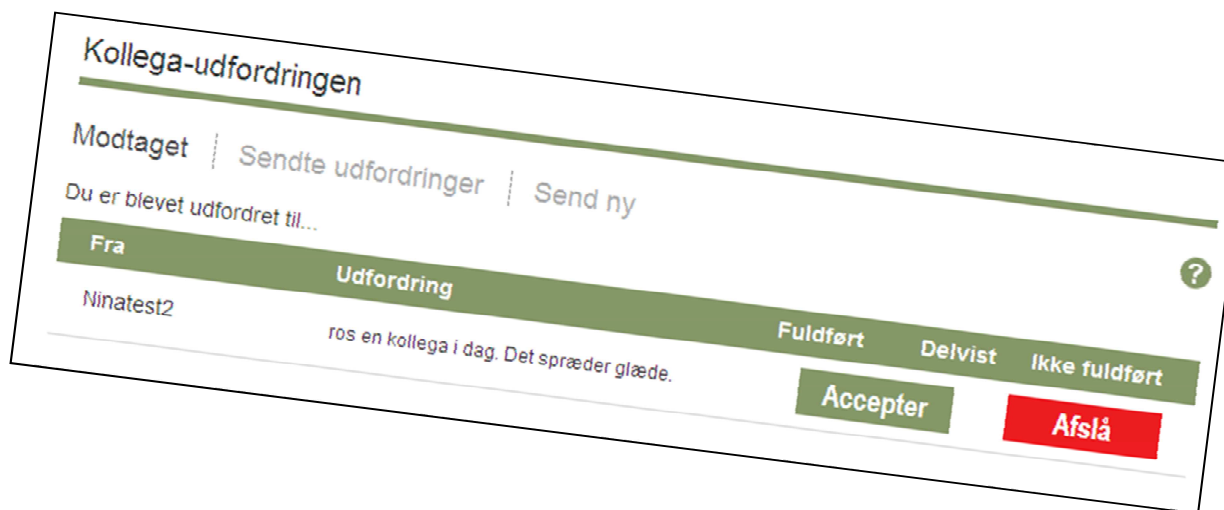

- 1. Du finder en kollega, som du vil udfordre
  - Du vælger selve udfordringen og sender den
  - Kollegaen skal nu acceptere din udfordring
  
- 2. Du skal også selv acceptere eller afslå dine egne udfordringer

**HUSK**  
at følge op  
på dine kollega  
udfordringer



## Vær opmærksom på dine kollegaer

- Du kan hjælpe – og blive hjulpet og underholdt

Send beskeder, opskrifter, artikler, quiz m.v. til alle deltagere i SoSu-liv

- Du kan motivere og opmuntre kollegaer

- Grupper
- Debatfora
- Tage billeder
- Kærlige hilsner

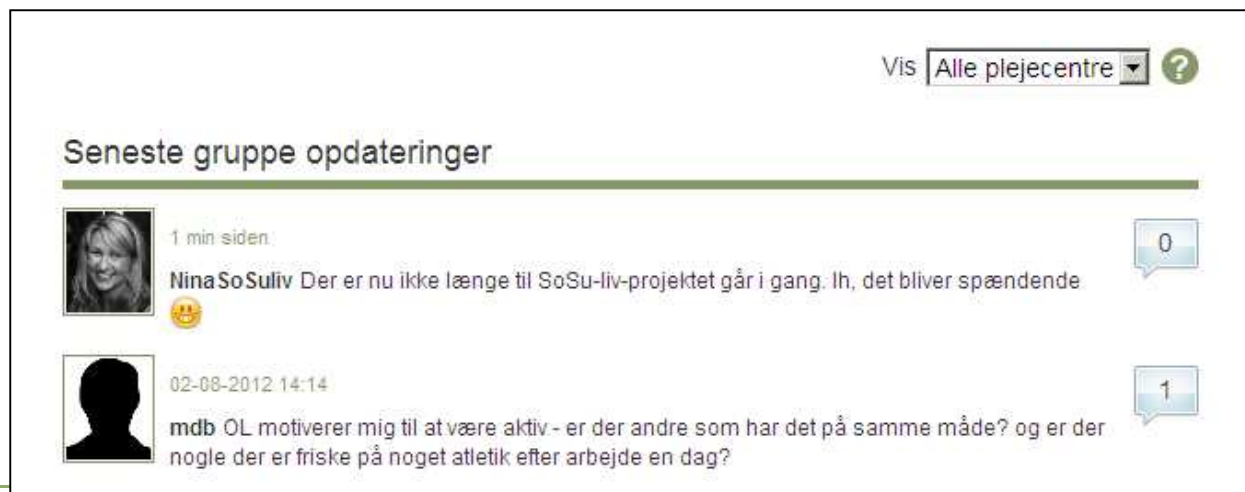

Vis  ?

### Seneste gruppe opdateringer

-  1 min siden  
**Nina So Suliv** Der er nu ikke længe til SoSu-liv-projektet går i gang. Ih, det bliver spændende 😊 0
-  02-08-2012 14:14  
**mdb** OL motiverer mig til at være aktiv - er der andre som har det på samme måde? og er der nogle der er friske på noget atletik efter arbejde en dag? 1

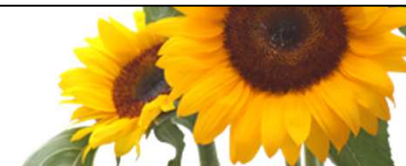

## Husk dig selv...

- Du kan finde inspiration til nye vaner under "Mine vaner"
- Du kan vælge nye vaner inden for kost, motion, rygning og velvære
- Du bestemmer selv, hvor længe du vil afprøve din nye vane

**Mine vaner**

**Ny vane**

Vælg din vane:

Jeg lover mig selv at:

Vælg periode:

**Opret vane**

**Oprettede vaner**

|                                                                                                                         | Fuldført              | Delvist               | Ikke fuldført         |
|-------------------------------------------------------------------------------------------------------------------------|-----------------------|-----------------------|-----------------------|
| Jeg lover mig selv at gå en tur efter arbejde et par gange om ugen, til at klare hoved og få dejlig frisk luft i 2 uger | <input type="radio"/> | <input type="radio"/> | <input type="radio"/> |
| Jeg lover mig selv at cykle en lang tur efter arbejde to gange om ugen i 2 uger                                         | <input type="radio"/> | <input type="radio"/> | <input type="radio"/> |
| Jeg lover mig selv at lave afslapningsøvelser inden sengetid i 1 måned                                                  | <input type="radio"/> | <input type="radio"/> | <input type="radio"/> |

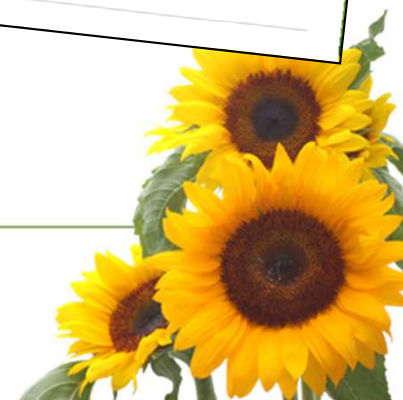

## Sådan får du sms-hjælp

- Du kan oprette en SMS-hjælper til minde dig om de nye gode vaner

### SMS Hjælper

Du kan enten vælge en smshjælper fra listen, eller selv skrive hvad SoSu-liv skal huske dig på. ?

Kategori:

Opret egen:

Dage imellem:  Tidspunkt:  :

Start dato:

| KATEGORI  | VANE/ÆNDRING                                        | DAGE IMELLEM | TID   |
|-----------|-----------------------------------------------------|--------------|-------|
| Personlig | Husk at lave afslapningsøvelser inden du går i seng | 2 dage       | 21:30 |

Hvis du vil slette en SMS Hjælper fra listen, skal du klikke på affaldsspanden.

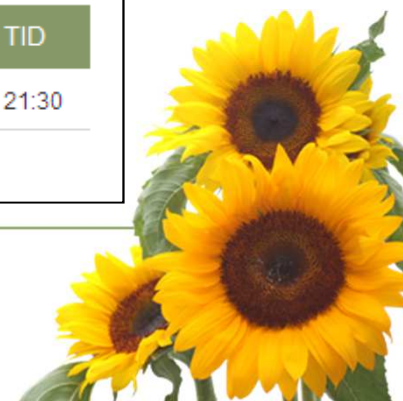

## Sådan får du personlig hjælp

- Du kan få hjælp med dine spørgsmål:
  - Brevkassevejleder – en personlig coach

Min side

- Ugens opgave
- Konkurrencen
- SMS hjælper
- Min kost
- Min motion
- Mit velvære
- Mit rygestop
- Vægt og cm
- Min status
- Mine vaner

Min vejleder

Indbakke | Sendte beskeder | Ny besked

Du kan altid skrive til din personlige vejleder i SoSu-liv. Det gør du her.

Modtager:

Emne:

Hej,  
Jeg har dårlige knæ, men vil gerne begynde at løbe. Har du nogle gode råd?  
Hilsen Eva|

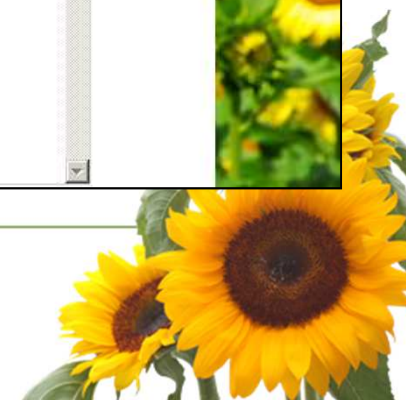

Min side &gt; Min kost &gt; Dagens kost

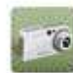

Billedgalleri (5)

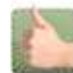

Kollega-udfordringen (0)

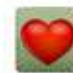

Kærlige hilsner (0)

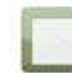

Min vejleder (4)

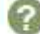

## Min side

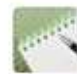

Ugens opgave

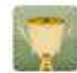

Konkurrencen

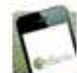

SMS hjælper

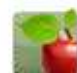

Min kost

- Overblik

- **Dagens kost**

- Madplan

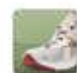

Min motion

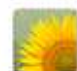

Mit velvære

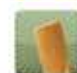

Mit rygestop

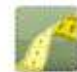

Vægt og cm

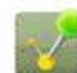

Min status

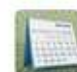

Mine vaner

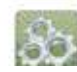

Indstillinger

## Dagens kost

Her er dit værktøj til at registrere dine daglige måltider og se hvor mange kalorier de indeholder. Du får hjælp fra SoSu-livs felter og farver til at sammensætte nogle sunde og mættende måltider, der passer lige til dit daglige behov.

Du kan indtaste alle dine måltider fra morgen til aften, ved hjælp af feltlistens mange varer. Dine anbefalede felter og farver fortæller dig, hvor mange felter og kalorier du kan spise i løbet af dagen, og hvordan du bør sammensætte måltidet. På den måde kan du holde øje med, om dine daglige måltider matcher SoSu-livs personlige anbefaling til dig, og nemt holde din vægt eller tabe dig.

God fornøjelse.

August 2012 | Fredag d. 17

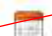

Åben kalender ?

Vis felter som kJ (kilojoule)

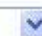

Om feltsystemet

■ Anbefalede felter: 40 felter ?

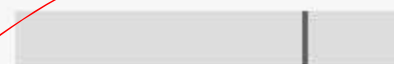

■ Bonusfelter: 0 felter

Protein | 0  
Fedt | 0  
Sukker | 0  
Kulhydrat | 0  
Alkohol | 0

■ Mindst 6 felter ?  
■ Højest 13 felter  
■ Ikke for mange  
■ Resten af felterne

Morgenmad

0 felter (0 kJ)

Formiddag

0 felter (0 kJ)

Frokost

0 felter (0 kJ)

Eftermiddag

0 felter (0 kJ)

Aftensmad

0 felter (0 kJ)

## Feltlisten

Manuel indtastning

Søg

Tilføj til Sen aften ?

Vælg kategori Favoritliste

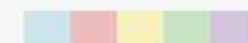
 Tilføj til listen

 Tilføj



Kost > Kogebog > Aftensmad > **Mexi-gryde med røde bønner, oksekød og friske tomater**

## Mexi-gryde med røde bønner, oksekød og friske tomater

4 personer

- 1** Ingredienser   **2** Indkøbsliste   **3** Sådan gør du

400 g. hakket oksekød  
250 g. kogte røde bønner  
2 stk. friske tomater  
1/4 frisk chili  
1 tsk. olivenolie  
1 stk. alm. løg  
20 g mørk chokolade  
1/2 dl tomatpuré  
1 1/4 dl vand

Antal felter pr. portion:  
**5,4**

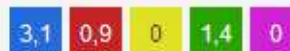

Sværhedsgrad:

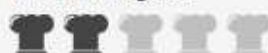

Tilberedningstid:  
**50 minutter**

Arbejdstid:  
**20 minutter**

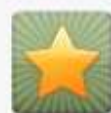

Giv en karakter

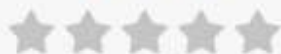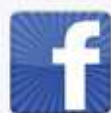

Del på Facebook

Del denne artikel på Facebook  
[Klik her](#)

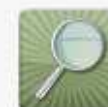

Find opskrifter

Skriv dit søgeord i feltet og find hurtigt din opskrift

Søg

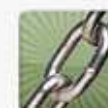

Send til en ven

Del denne side med en ven, kollega, familie [Klik her](#) »

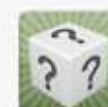

Vidste du...

.. at du skal løbe i cirka en time for at forbrænde fire almindelige øl.

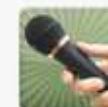

Afstemning

Går du op i at spise sundt?

- Ja
- Nogle gange

Kost > Madbio > Aftensmad

## Aftensmad

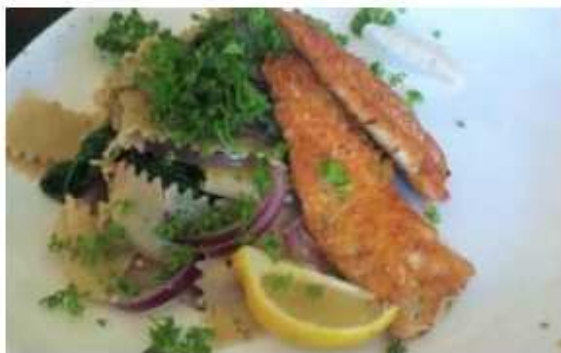

Parmesan panerede  
rødspættefiletter »

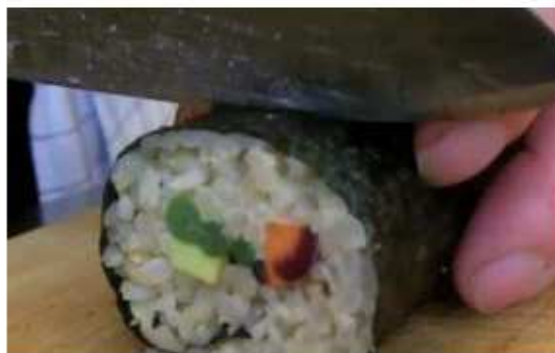

Grøntsags sushi - Makiruller »

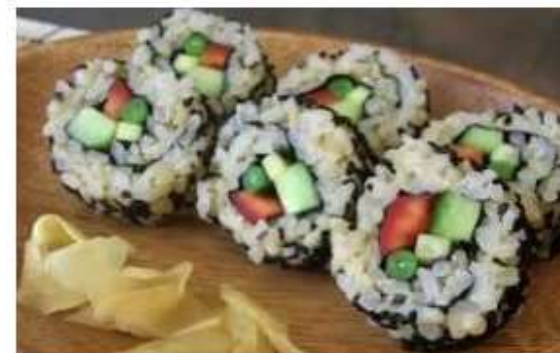

Grøntsags sushi II – inside-  
out »

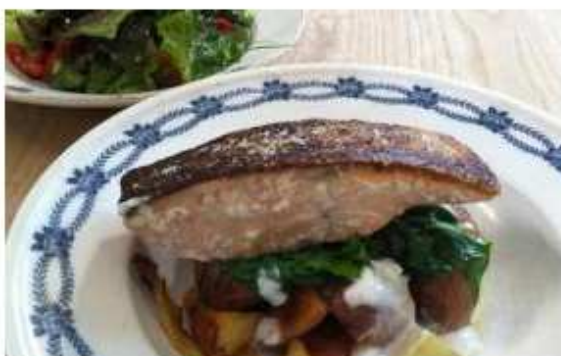

Stegt laks »

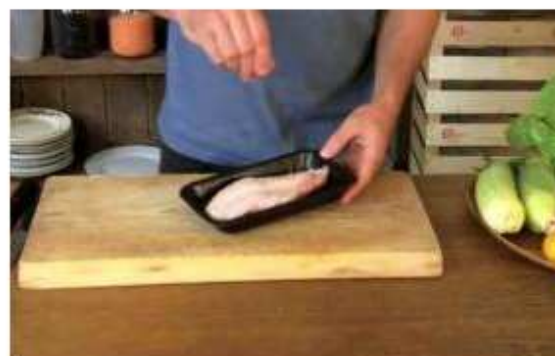

Stegt kyllingebryst »

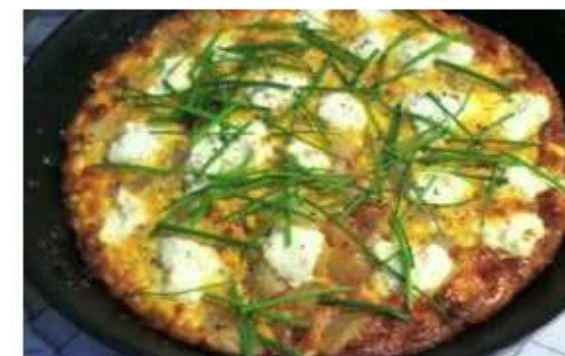

Æggekage med majs,  
kartofler og gedeost »

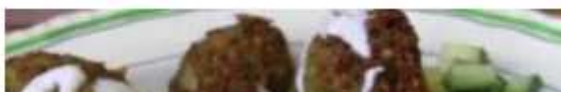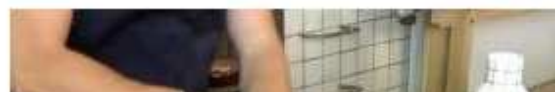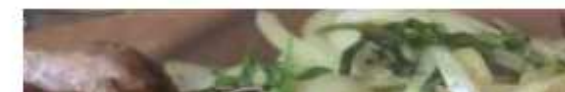

## Min side

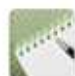

Ugens opgave

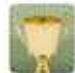

Konkurrencen

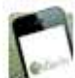

SMS hjælper

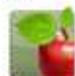

Min kost

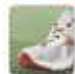

Min motion

- Overblik

- **Dagens aktivitet**

- Aktivitetsplan

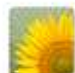

Mit velvære

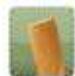

Mit rygestop

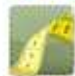

Vægt og cm

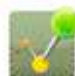

Min status

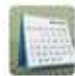

Mine vaner

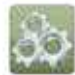

Indstillinger

## Dagens aktivitet

Her kan du taste dine daglige aktiviteter ind. Det er godt at få pulsen op og være aktiv i 30 minutter om dagen eller mere.

Du vælger dine aktiviteter via aktivitetslisten, hvor du kan finde aktiviteter eller du kan bruge søgefunktionen til at finde dem. Når du indtaster motion og aktivitet, optjener du bonusfelter.

Bonusfelterne fortæller dig, hvor mange ekstra felter du kan bruge til at spise og drikke for, når du har dyrket motion eller bevæget dig. Bonusfelterne kan fint bruges til at spise lidt ekstra for, hvis du motionerer meget eller til hyggelige arrangementer. Hvis du vil tabe dig, kan du undlade at bruge dem, og dermed går vægttabet endnu hurtigere.

God fornøjelse.

August 2012 | Torsdag d. 9

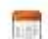

Åben kalender

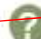

Dagens optjente bonusfelter: **4,5 bonusfelter**

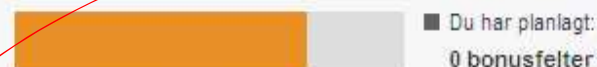

Det anbefales at motionere 30 minutter om dagen

Ugens optjente bonusfelter: **22,5 bonusfelter**

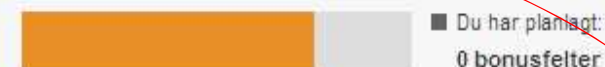

### Aktiviteter

4,5 bonusfelter

Cyklng, moderat

4,5 bonusfelter

40 minutter **Opdater** Tilføj

### Aktiviteter

Søg

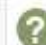

Vælg kategori

Cyklng, moderat

min **Tilføj til listen** Tilføj

Motion &gt; Quiz

## Quiz

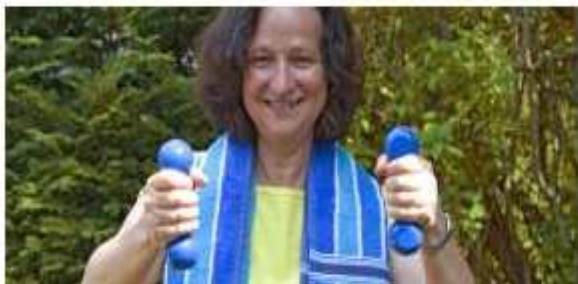[Træningstips »](#)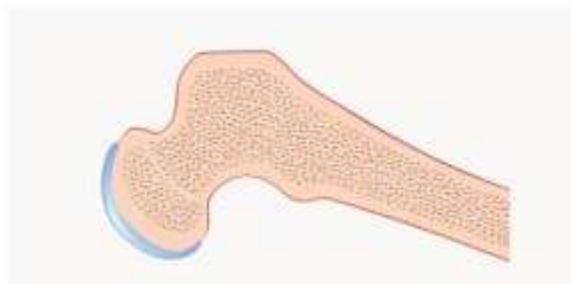[Knogleakademiet »](#)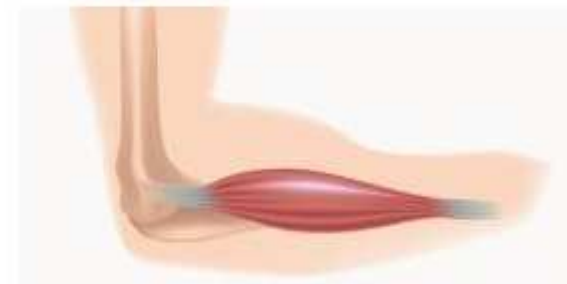[Hvor meget ved du om muskler? »](#)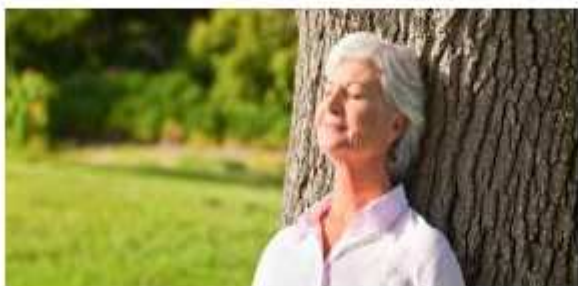[En dyb indånding »](#)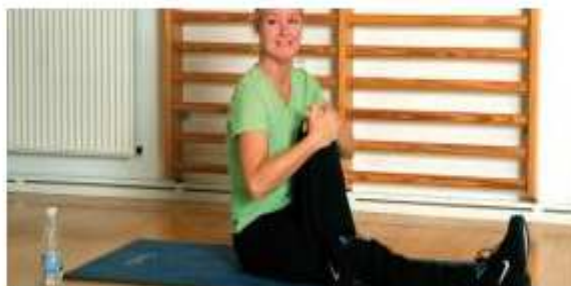[Kvinder og træning »](#)

## Min side

-  Ugens opgave
-  Konkurrencen
-  SMS hjælper
-  Min kost
-  Min motion
-  Mit velvære
-  Mit rygestop
- På vej**
- Rygestop
- Ikke ryger
-  Vægt og cm
-  Min status
-  Mine vaner
-  Indstillinger

## På vej

Her kan du som ryger på en nem og overskuelig måde registrere det antal cigaretter, du ryger på en dag, samt finde frem til, om der er et mønster i din rygning. Du kan bruge dette redskab til at blive klar over, hvor meget du ryger, og om det er i bestemte situationer, eller i et bestemt humør du ryger mest.

Dette hjælper dig til at forstå dine egne rygevaner, og du kan bruge det til at finde frem til, om du ønsker at stoppe med at ryge.

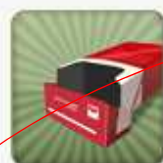

### Registrering af rygning ?

- 0 +

[Se udvikling »](#)

(Indtastningen nulstilles automatisk HVER dag kl. 23:59)

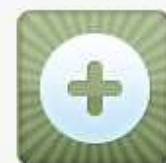

### Fordele og ulemper ?

|                       |   |
|-----------------------|---|
| Fordele ved rygning:  | 0 |
| Ulemper ved rygning:  | 0 |
| Fordele ved rygestop: | 0 |
| Ulemper ved rygestop: | 0 |

[Gå til indtastning »](#)

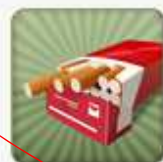

### Rygemønstre ?

Cigaretter røget i dag: 0

[Gå til indtastning »](#)

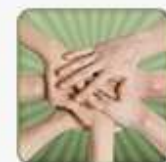

### Bliv klar til rygestop

Få gode råd og vejledning til dit rygestop.

[Læs mere »](#)

## Min side

-  Ugens opgave
-  Konkurrencen
-  SMS hjælper
-  Min kost
-  **Min motion**
-  Mit velvære
-  Mit rygestop
  - På vej
  - **Rygestop**
  - Ikke ryger
-  Vægt og cm
-  Min status
-  Mine vaner
-  Indstillinger

## Rygestop

Her kan du indtaste din ønskede dato for rygestop eller nedskæring af cigaretter, når du har besluttet dig for, at det er det du vil. For at motiovere dig selv, kan du skrive dine mål og ønsker for fremtiden ned, så du altid kan se tilbage på, hvorfor du valgte at kvitte smøgerne.

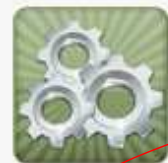

### Indstillinger

Jeg vil gerne

Vælg dato  

**Gem**

### Nedtælling til dit rygestop

**00 / 00 / 0000**

DAG MÅNED ÅR

Du har ikke valgt om du vil skære ned eller stoppe helt.

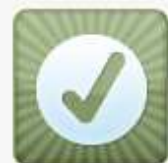

### Dine mål og ønsker

**Rediger listen**

Du har ikke oprettet mål og ønsker.

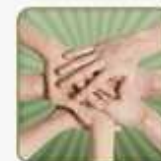

### Kvit cigaretterne eller skær ned

Få hjælp til at stoppe med at ryge, eller skær dit forbrug ned her.

**Skær ned »**

**Kvit cigaretter »**

## Den store konkurrence: Danmarks bedste SoSu'ere

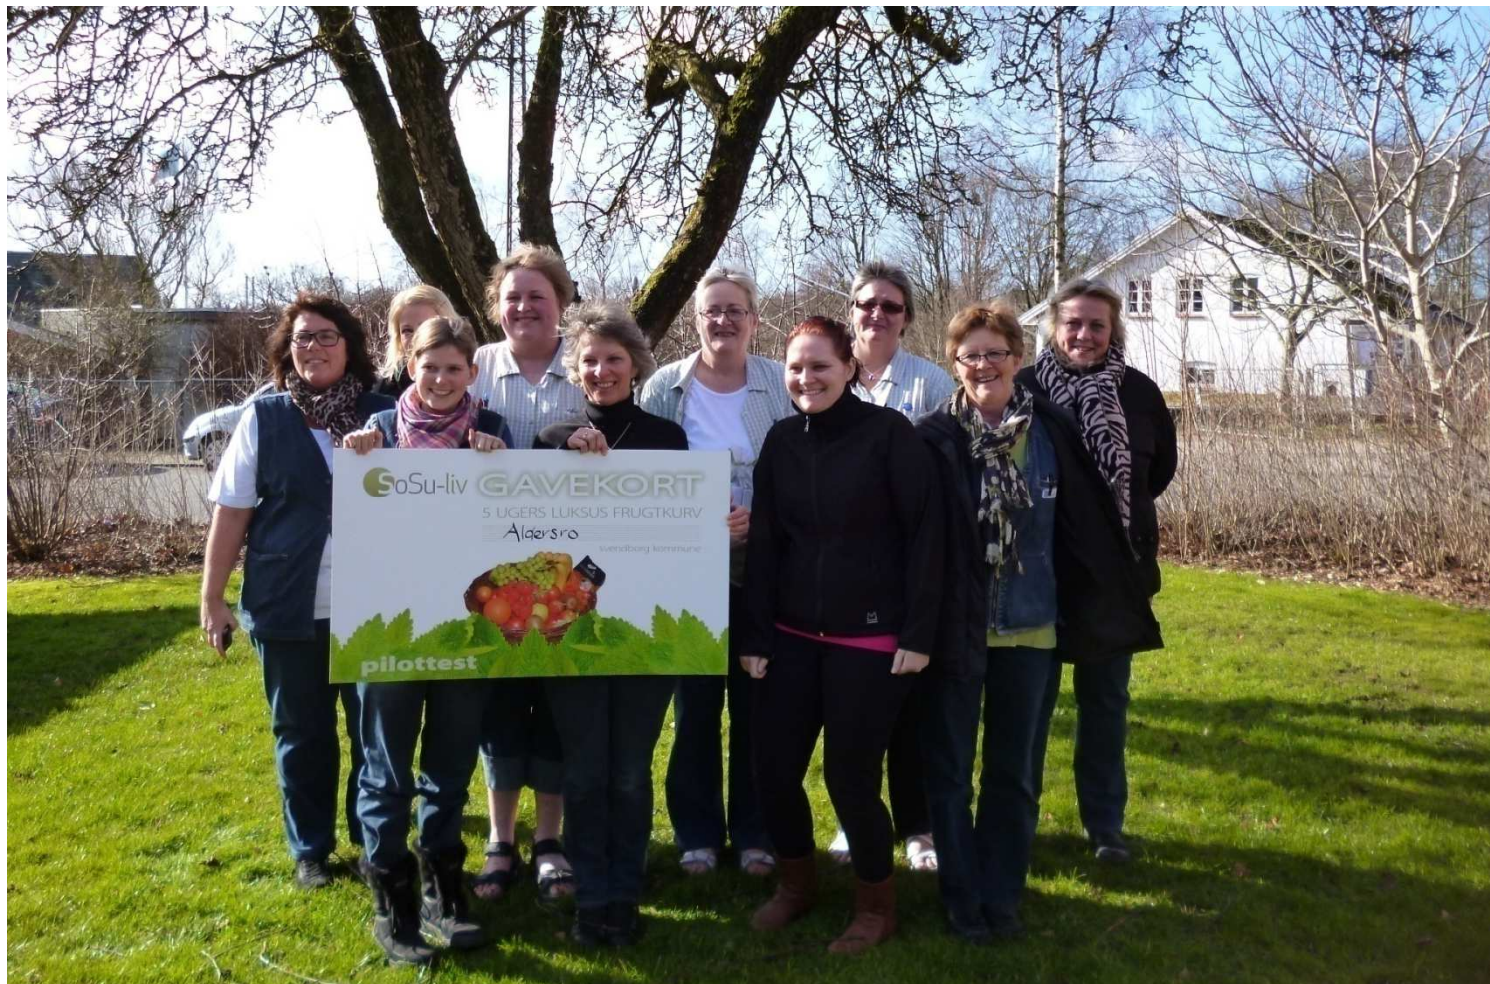

 SoSu-liv

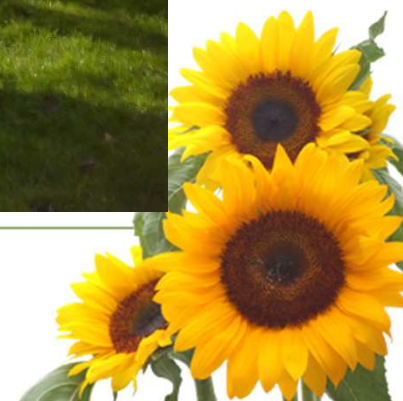

## Den store konkurrence: Danmarks sundeste plejecenter

- Dit hold:** Alle tilmeldte kollegaer på din arbejdsplads
- Varighed:** 16 uger
- Disciplin:** Aktiviteter, øvelser og opgaver inde for kost, motion, rygning og velvære
- Point:** Alle aktiviteter giver point  
- på hjemmesiden og i den fysiske verden
- Holdets point:** Gns. point/medarbejder
- Vinder:** Flest point i gns./medarbejder efter 16 uger
- Præmie:** En aften på plejecenteret med Karen Marie Lillelund  
- med op til 100 gæster

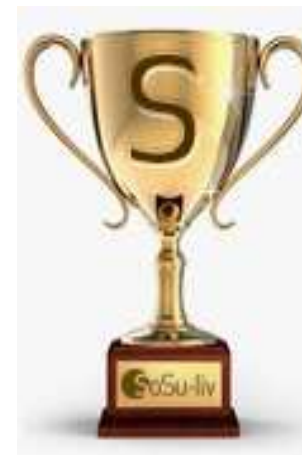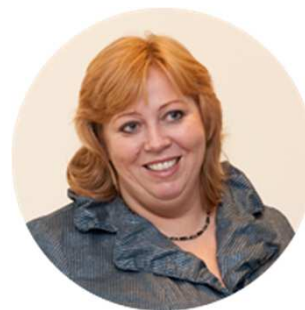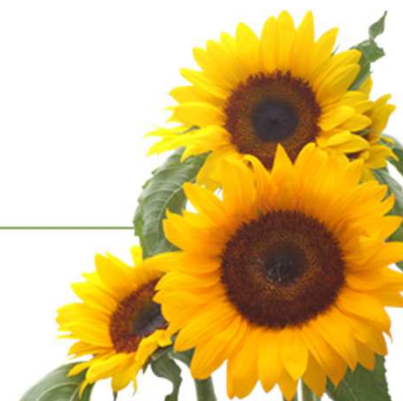



## Løbende konkurrence: Månedens hold

Opmuntringer undervejs

- Én gang om måneden kåres månedens hold (september, oktober osv.)
- Holdets point laves om til lodder

Dit holds lodder indgår i lodtrækning

- Ét hold vinder lodtrækningen
- Vinderne får direkte besked og offentliggøres på hjemmesiden

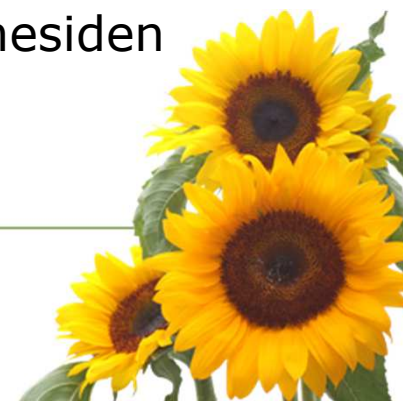

## Følg stillingen i konkurrencen



**SoSu-liv konkurrencen**

|                            |     |
|----------------------------|-----|
| 1. Finsensvej (Frederiksb) | (0) |
| 2. Hospitalet (Frederiksb) | (0) |
| 3. Howitzvej (Frederiksbe) | (0) |



**Månedens hold**

Tallet i parentes angiver antal lodder til lodtrækningen.

|                            |     |
|----------------------------|-----|
| 1. Finsensvej (Frederiksb) | (0) |
| 2. Hospitalet (Frederiksb) | (0) |
| 3. Howitzvej (Frederiksbe) | (0) |

## Læs om de spændende præmier I kan vinde

|                                                                                                                             |                                                                                                                               |                                                                                               |
|-----------------------------------------------------------------------------------------------------------------------------|-------------------------------------------------------------------------------------------------------------------------------|-----------------------------------------------------------------------------------------------|
|                                           |                                            |           |
| <p><b>September-holdet</b></p> <p>En taske med træningselastik og øvelseshæfte, så I kan få musklerne til at slappe af.</p> | <p><b>Oktober-holdet</b></p> <p>Et besøg af en professionel bartender, så I kan få serveret sunde, frisklavede smoothies.</p> | <p><b>November-holdet</b></p> <p>En svingende oplevelse, hvor I bliver undervist i Zumba.</p> |

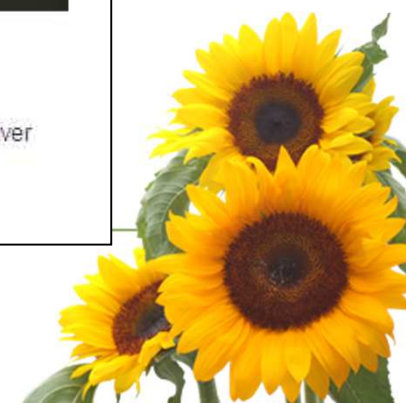

## SoSu-liv som et forskningsprojekt

- SoSu-liv projektet er anmeldt til
  - Den Videnskabsetiske Komité
  - Datatilsynet

Du skal give  
dit samtykke til  
din deltagelse efter  
informationsmødet

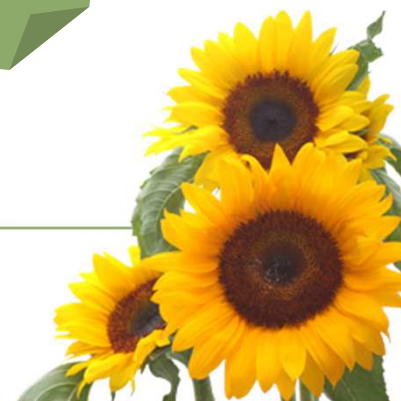

## Forskning med lodtrækning

- Projektets deltagere er delt i 2 grupper
  - nogle skal bruge SoSu-liv
  - andre skal **ikke** bruge SoSu-liv (kontrol)

Vi interesserer os for forskellen i resultaterne efter 9 måneder

I skal bruge SoSu-liv i de næste 9 måneder



## SoSu-liv kommuner

FREDEKISBERG  
KOMMUNE

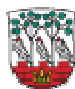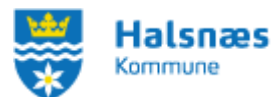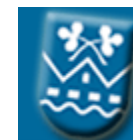

Hvidovre

∞  
Sønderborg

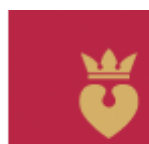

HILLERØD  
KOMMUNE

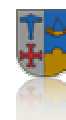

Ishøj Kommune

---

SoSu-liv

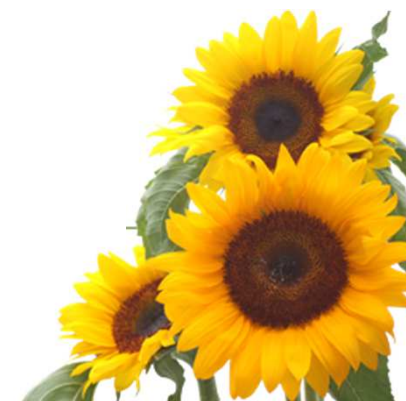

## 1. Trin: Elektronisk spørgeskema på hjemmesiden

- Du skal svare på et spørgeskema om dig selv, dit helbred, dine vaner og din trivsel
- Udfyld skemaet derhjemme, inden du kommer til helbredsundersøgelsen. Det tager ca. 15-20 minutter

The screenshot shows the 'SoSu-liv' website interface. The main section is titled 'Om dig selv' and contains several questions with dropdown menus and radio buttons. A 'Tilbage' button is visible. A 'Step 3' label is placed over the dropdown menu for 'Stilling'. To the right, an 'Overblik' section shows a progress indicator with 7 steps, where step 2 'Om dig selv' is currently active.

**Om dig selv**

Er du kvinde eller mand?  Kvinde  Mand

Har du hjemmeboende børn?

Civilstand

Arbejder du typisk?

Stilling

**Step 3**

- Sygehjælper
- Social- og sundhedsassistent
- Social- og sundhedshjælper
- Plejer
- Plejhjemsassistent
- Hus-/Rengørings-/Serviceassistent
- Beskæftigelsesvejleder
- Køkkenmedhjælpere (Assisterer/Ledere)
- Hjemmehjælper
- Pedel
- Ufaglært
- Leder
- Elev
- Andet

**Overblik**

- 1 Kom godt i gang
- 2 Om dig selv
- 3 Vaner
- 4 Helbred
- 5 Søvn, velvære og trivsel
- 6 Personlig info
- 7

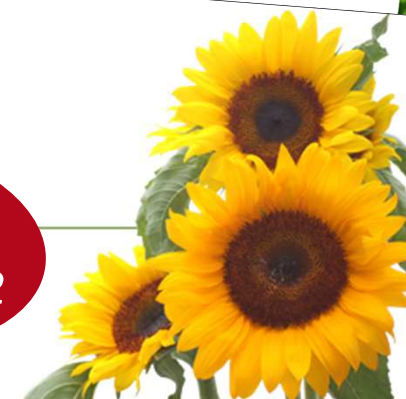

## Spørgeskema på [www.sosu-liv.dk](http://www.sosu-liv.dk)

**SoSu-liv**

### Login

Lev sundere, bliv gladere, og få mere overskud i hverdagen med SoSu-liv

Kodeord

**Login** **Opret bruger**

[Har du glemt dit kodeord?](#)

Læs mere om cookies og beskyttelse af persondata på SoSu-liv [her](#) »

1. Gå ind på [www.sosu-liv.dk](http://www.sosu-liv.dk) og find dit Huskekort frem
2. Indtast dit navn og CPR-nr. under "opret bruger"
3. Svar på alle spørgsmål

Du er anonym.  
Forskerne kan se dine svar, men ikke din leder.

eltage?

**PenSam**   **KØBENHAVNS UNIVERSITET**  **MobileFitness**

## 2. Trin: Fysisk helbredsundersøgelse (Uge 0, 16, 38)

Vi måler:

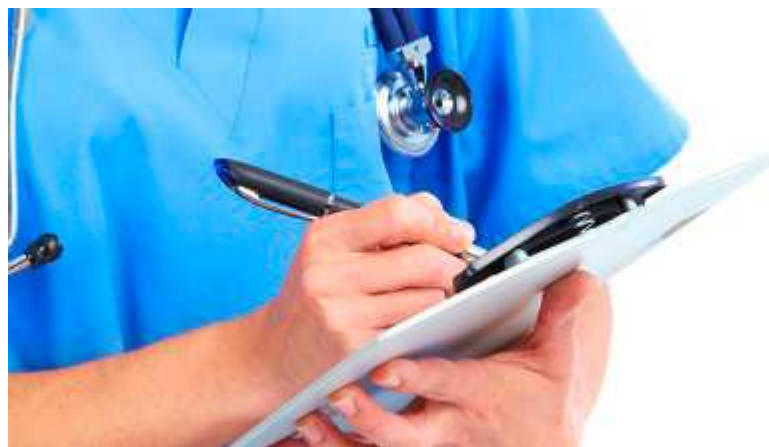

- Højde
  - Vægt
  - Talje- og hofteomkreds
  - Kropsfedt-procent
  - Blodtryk
  - Kolesterol (prik)
  - Blodsukker (prik)
- Det tager ca. 15 minutter





## Fysisk helbredsundersøgelse

- Selve helbredstjekket foregår her på stedet
- Du bliver målt **i enerum** – **i undertøj** af en SoSu-liv medarbejder
- Vi anbefaler, at du ikke har spist de sidste 3 timer
- Du får dine tal på papir med det samme
- Gem dine tal til næste undersøgelse om ca. 16 uger

**HOLD ØJE**  
med tid og sted  
for helbredsundersøgelse

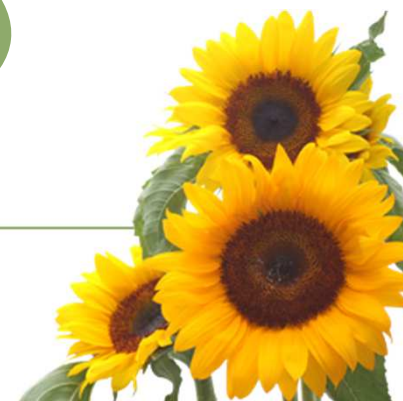

### Trin 3. Udvælg ét indsatsområde (løfte)

- Ud fra dine tal i spørgeskemaet og fra helbredsundersøgelsen vil SoSu-liv give dig én anbefaling om enten at:
  - tabe dig
  - spise sundere
  - komme i form
  - blive stærkere
  - skære ned på cigaretter
  - stoppe med at ryge
  - fastholde en sund livsstil
- Du vælger ét område, som du vil arbejde med de næste 16 uger. Vi kalder det "dit løfte"
- Efter 16 uger kan du evt. vælge et nyt løfte

KOM i PC CAFÉEN –  
Vi hjælper i gang



Så er du i gang på SoSu-Liv....

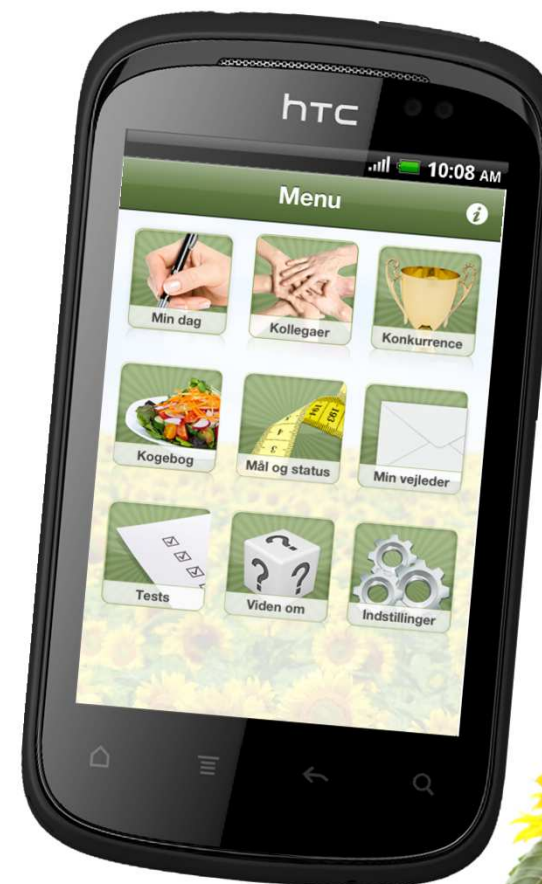

## Få hjælp og støtte fra projektet

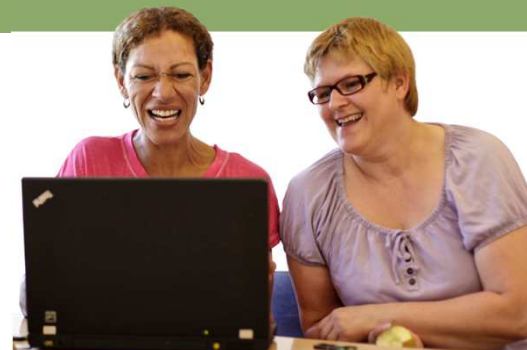

- Udfyldelse af spørgeskema, brug af mobiltelefon eller hjemmeside
  - Ring på **44 39 34 12** eller mail til [sosuliv@pensam.dk](mailto:sosuliv@pensam.dk)
- Teknisk Support
  - Ring på **22 78 25 28** til Claus



## Næste vigtige skridt

### 1. Find mappen frem

- Underskriv SAMTYKKE-erklæringen
- Aflever erklæringen til din leder og få dit personlige huskekort

### 2. Hjemme

- Log på første gang
- Udfyld spørgeskemaet

### 3. På arbejdet

- Helbredstjek

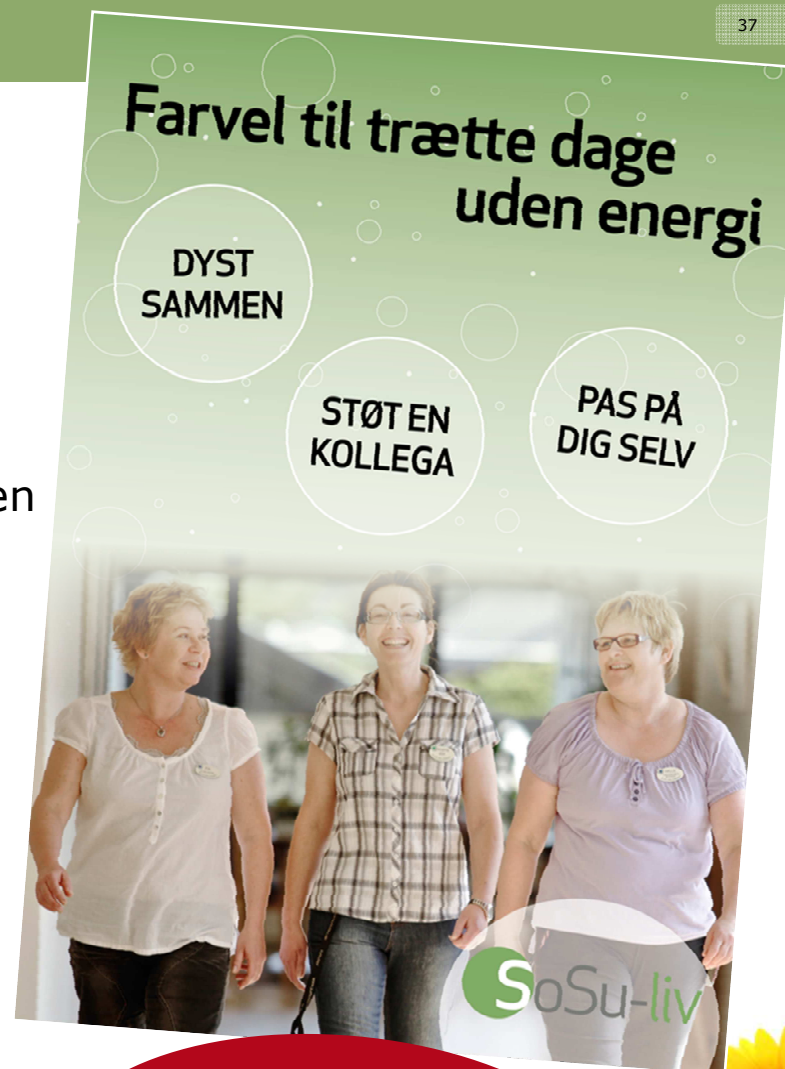

Vi ses til  
HELBREDSUNDERSØGELSE

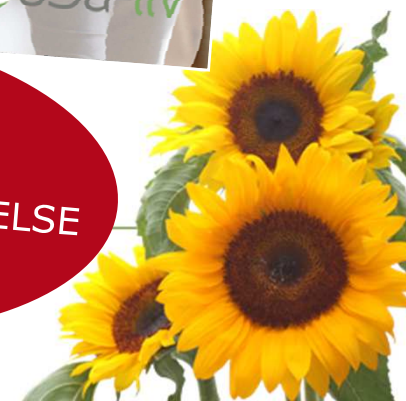

Supplement: jmir_v19i4e108_app2.pdf [file jmir_v19i4e108_app2.pdf]
